# Supplementary material for: Risk-sensitive foraging does not explain condition-dependent choices in settling reef fish larvae
Source: PeerJ journal article supplement (doi:10.7717/peerj.8333), 2020-01-13

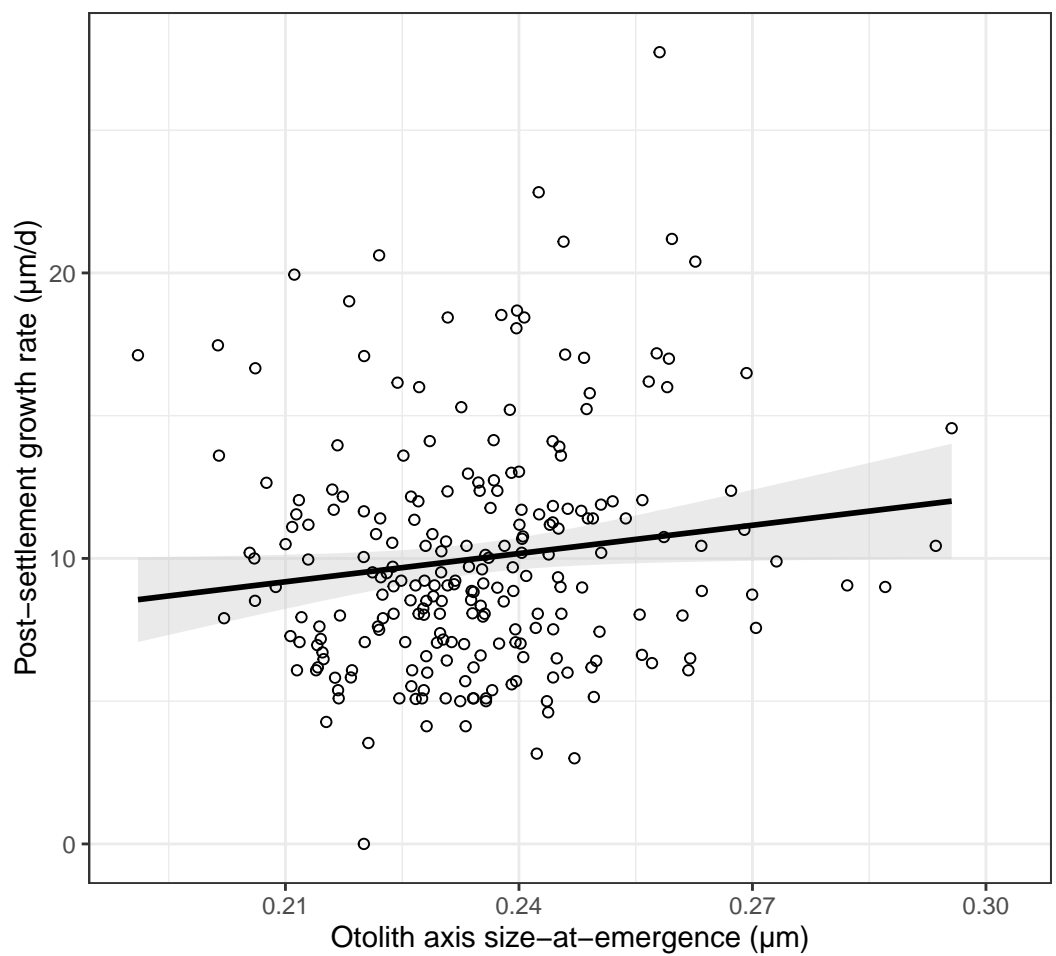

Supplement: FigS2_growth_vs_SAE.pdf [file FigS2_growth_vs_SAE.pdf]
