# Supplementary material for: Risk-sensitive foraging does not explain condition-dependent choices in settling reef fish larvae
Source: PeerJ journal article supplement (doi:10.7717/peerj.8333), 2020-01-13

(a)

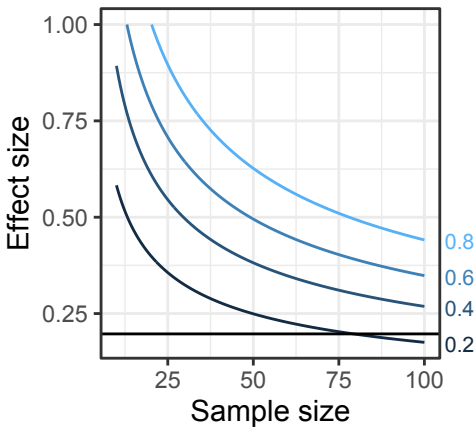

(b)

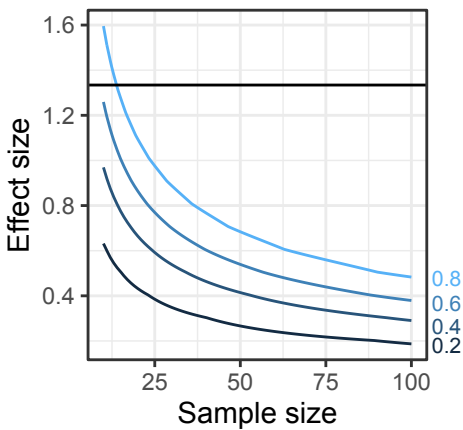

(c)

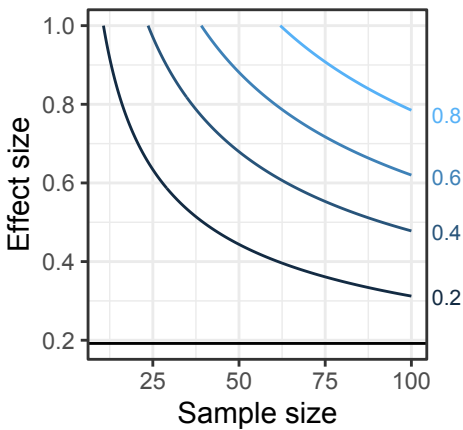

Supplement: FigS9_Growth_power.pdf [file FigS9_Growth_power.pdf]
